# Supplementary material for: UPLC-TOF/MS based urinary metabonomic studies reveal mild prevention effects of MDG-1 on metabolic disorders in diet-induced obese mice
Source: Royal Society of Chemistry journal article supplement (doi:10.1039/c4ay00796d), 2014-01-01
Supplement: c4ay00796d1.pdf [file c4ay00796d1.pdf]

The mass spectrum of potential biomarkers in reference standards and urine samples based on UPLC TOF MS in ESI positive mode

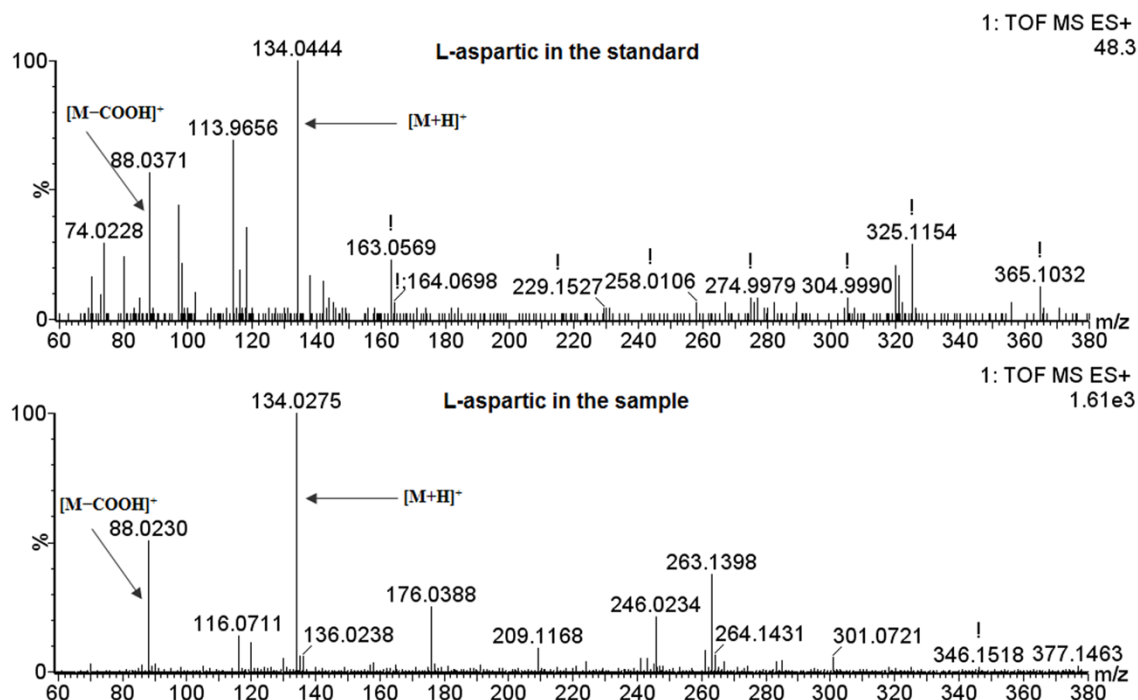

Fig.S1. the mass spectrum of L-aspartic acid in reference standard and the urine sample in positive mode based on UPLC TOF MS

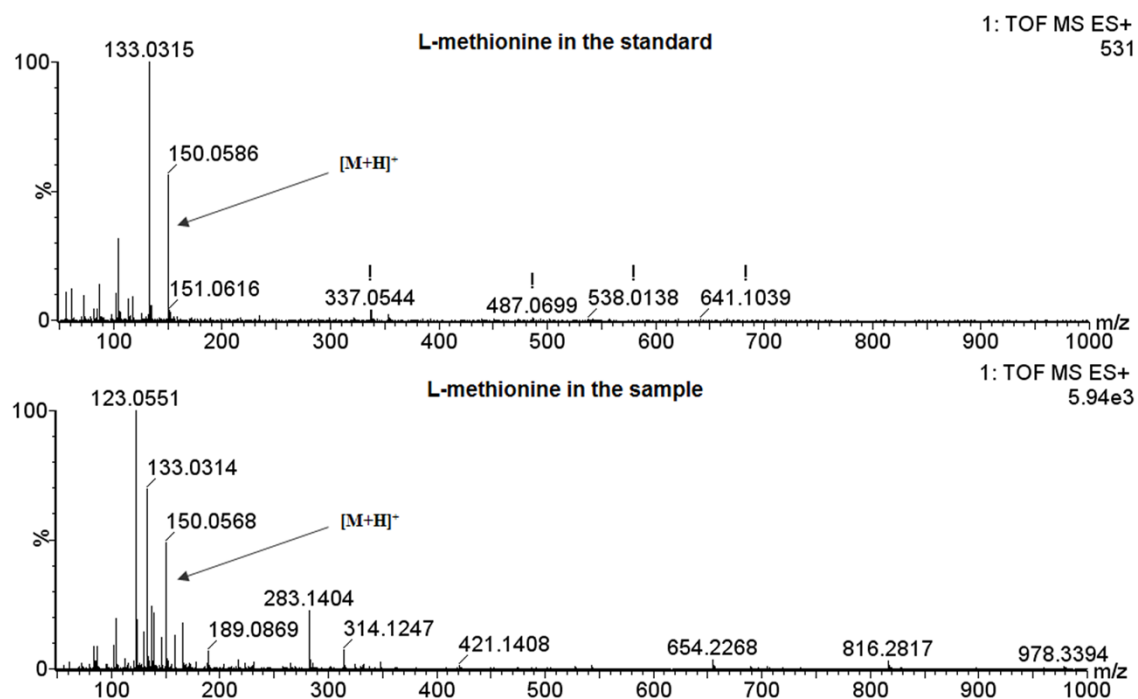

Fig.S2. the mass spectrum of L-methionine in reference standard and the urine sample in positive

mode based on UPLC TOF MS.

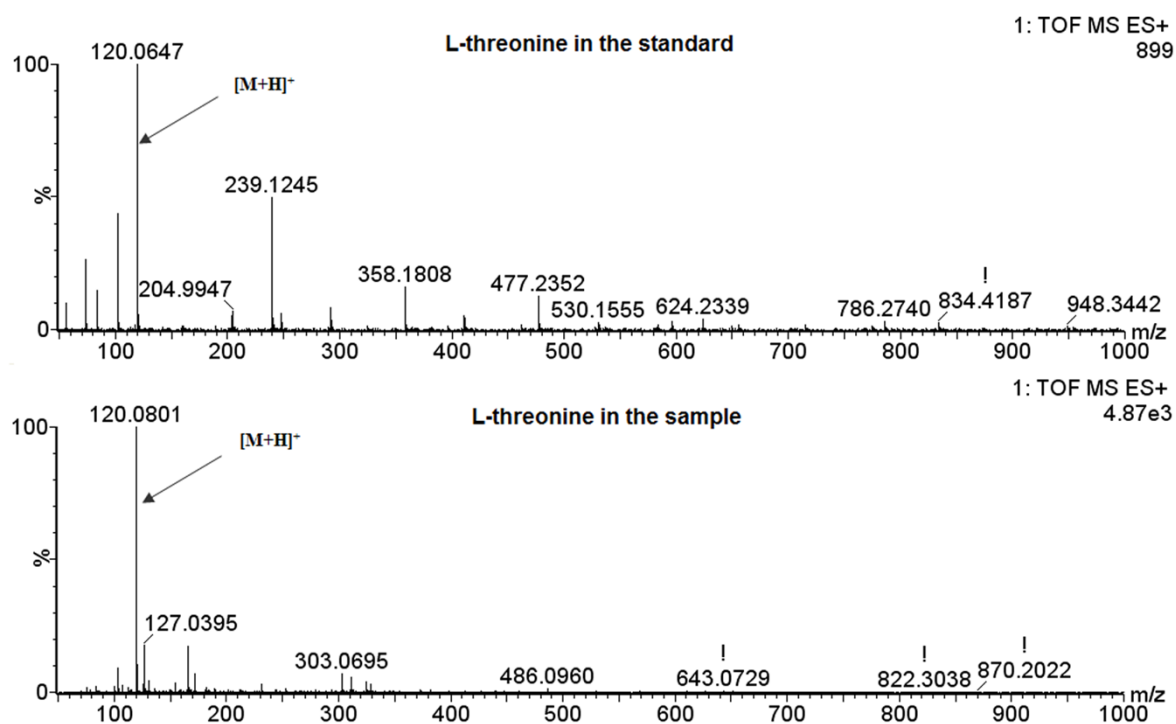

Fig.S3. the mass spectrum of L-threonine in reference standard and the urine sample in positive mode based on UPLC TOF MS.

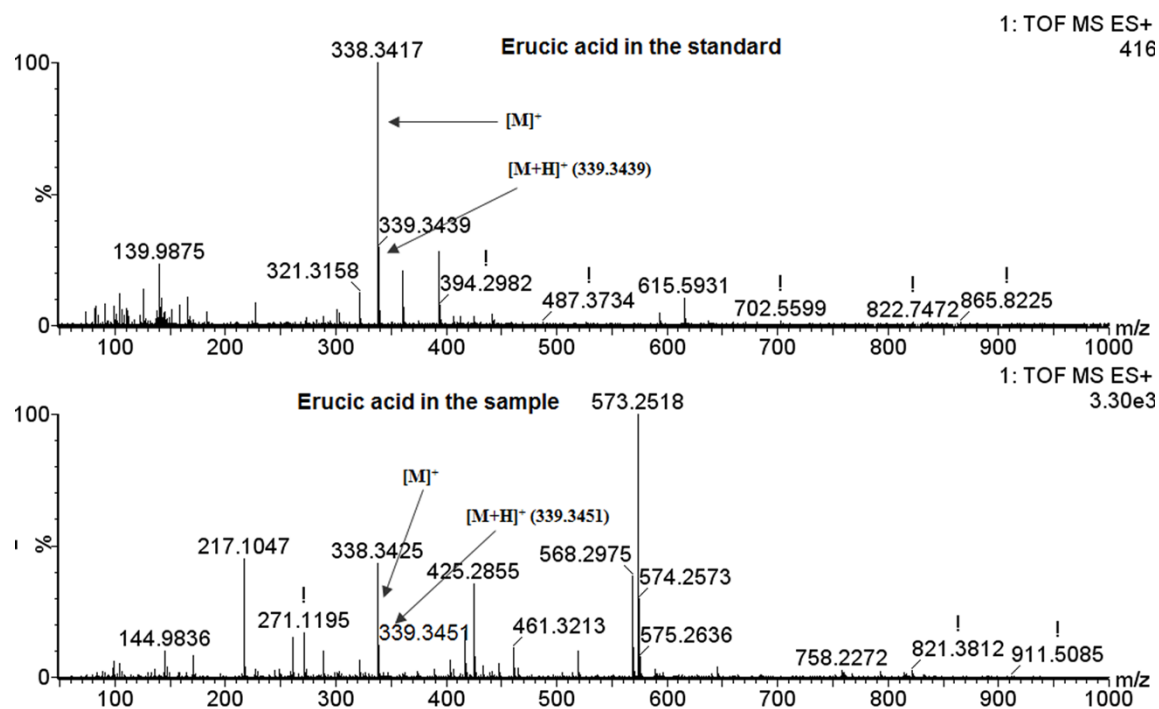

Fig.S4. the mass spectrum of erucic acid in reference standard and the urine sample in positive mode based on UPLC TOF MS.

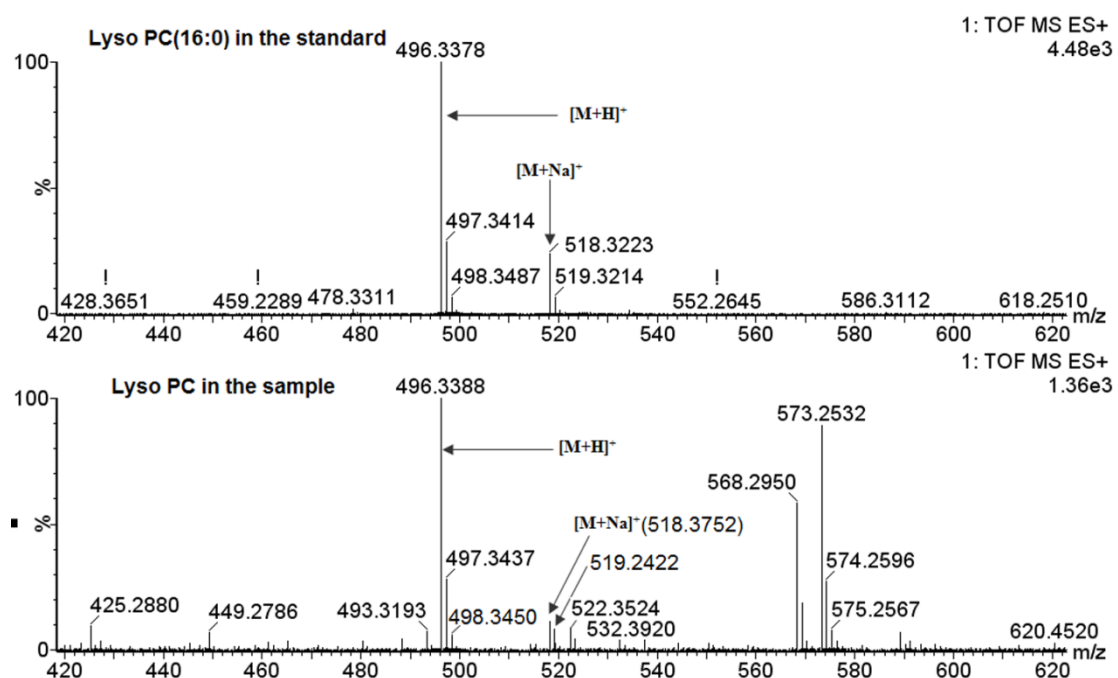

Fig.S5. the mass spectrum of Lyso PC (16:0) in reference standard and the urine sample in positive mode based on UPLC TOF MS.
